# Supplementary material
Source: Research Square preprint supplement (doi:10.21203/rs.3.rs-9503080/v1)
Supplement: Supplementary file 1 [file 80e4444c38587fd7e9e63d84.docx]

**Supplementary Materials:** The following are available online. Table S1: *Cis*-acting elements in the promotor region (upstream 2000 bp) of the grape *VaCCaMK* gene. Table S2: Stilbene content in the obtained cell lines. Table S3: Primers used for amplification of *VaCCaMK* cDNAs in PCR.
