# Supplementary material
Source: Research Square preprint supplement (doi:10.21203/rs.3.rs-9503080/v1)
Supplement: Supplementary file 2 [file a3f874798ffce62e2b7fb766.xlsx]

## Sheet: S1,promotor
Table S1. Cis-acting elements in the promotor region (upstream 2000 bp) of the grape VaCCaMK gene
PlantCARE_12742	MYB-like sequence	TAACCA	-579	6	+	Arabidopsis thaliana
PlantCARE_12742	TGA-element	AACGAC	-441	6	-	Brassica oleracea	auxin-responsive element
PlantCARE_12742	GCN4_motif	TGAGTCA	-1985	7	-	Oryza sativa	cis-regulatory element involved in endosperm expression
PlantCARE_12742	GCN4_motif	TGAGTCA	-269	7	-	Oryza sativa	cis-regulatory element involved in endosperm expression
PlantCARE_12742	TATA-box	TATA	-1994	4	+	Arabidopsis thaliana	core promoter element around -30 of transcription start
PlantCARE_12742	TATA-box	TATA	-1970	4	+	Arabidopsis thaliana	core promoter element around -30 of transcription start
PlantCARE_12742	TATA-box	TATAAA	-1951	6	-	Helianthus annuus	core promoter element around -30 of transcription start
PlantCARE_12742	TATA-box	TATAA	-1950	5	-	Arabidopsis thaliana	core promoter element around -30 of transcription start
PlantCARE_12742	TATA-box	TATA	-1949	4	+	Arabidopsis thaliana	core promoter element around -30 of transcription start
PlantCARE_12742	TATA-box	TATAAA	-1939	6	-	Helianthus annuus	core promoter element around -30 of transcription start
PlantCARE_12742	TATA-box	TATATAA	-1938	7	-	Arabidopsis thaliana	core promoter element around -30 of transcription start
PlantCARE_12742	TATA-box	TATATA	-1937	6	+	Arabidopsis thaliana	core promoter element around -30 of transcription start
PlantCARE_12742	TATA-box	ATATAA	-1936	6	+	Brassica oleracea	core promoter element around -30 of transcription start
PlantCARE_12742	TATA-box	TATA	-1935	4	+	Arabidopsis thaliana	core promoter element around -30 of transcription start
PlantCARE_12742	TATA-box	TATA	-1917	4	+	Arabidopsis thaliana	core promoter element around -30 of transcription start
PlantCARE_12742	TATA-box	TATACA	-1209	6	-	Helianthus annuus	core promoter element around -30 of transcription start
PlantCARE_12742	TATA-box	TATA	-1207	4	+	Arabidopsis thaliana	core promoter element around -30 of transcription start
PlantCARE_12742	TATA-box	TATA	-723	4	-	Arabidopsis thaliana	core promoter element around -30 of transcription start
PlantCARE_12742	TATA-box	ATTATA	-593	6	+	Brassica napus	core promoter element around -30 of transcription start
PlantCARE_12742	TATA-box	TATAA	-592	5	-	Arabidopsis thaliana	core promoter element around -30 of transcription start
PlantCARE_12742	TATA-box	TATA	-591	4	-	Arabidopsis thaliana	core promoter element around -30 of transcription start
PlantCARE_12742	TATA-box	TACAAAA	-552	7	+	Oryza sativa	core promoter element around -30 of transcription start
PlantCARE_12742	TATA-box	TATA	-459	4	-	Arabidopsis thaliana	core promoter element around -30 of transcription start
PlantCARE_12742	TATA-box	TATAAA	-373	6	-	Helianthus annuus	core promoter element around -30 of transcription start
PlantCARE_12742	TATA-box	TATAA	-372	5	-	Arabidopsis thaliana	core promoter element around -30 of transcription start
PlantCARE_12742	TATA-box	TATA	-371	4	-	Arabidopsis thaliana	core promoter element around -30 of transcription start
PlantCARE_12742	TATA-box	TATA	-181	4	-	Arabidopsis thaliana	core promoter element around -30 of transcription start
PlantCARE_12742	TATA-box	TACAAAA	-159	7	+	Oryza sativa	core promoter element around -30 of transcription start
PlantCARE_12742	TATA-box	ATATAA	-133	6	+	Brassica oleracea	core promoter element around -30 of transcription start
PlantCARE_12742	TATA-box	TATA	-132	4	-	Arabidopsis thaliana	core promoter element around -30 of transcription start
PlantCARE_12742	MYB	CAACAG	-735	6	+	Arabidopsis thaliana
PlantCARE_12742	MYB	TAACCA	-579	6	+	Arabidopsis thaliana
PlantCARE_12742	MYB	CAACCA	-273	6	-	Arabidopsis thaliana
PlantCARE_12742	ERE	ATTTCATA	-874	8	+	Nicotiana glutinos
PlantCARE_12742	ARE	AAACCA	-1963	6	+	Zea mays	cis-acting regulatory element essential for the anaerobic induction
PlantCARE_12742	ARE	AAACCA	-24	6	-	Zea mays	cis-acting regulatory element essential for the anaerobic induction
PlantCARE_12742	Myb	CAACTG	-1340	6	+	Arabidopsis thaliana
PlantCARE_12742	Myb	TAACTG	-613	6	+	Arabidopsis thaliana
PlantCARE_12742	Myb	CAACTG	-512	6	+	Arabidopsis thaliana
PlantCARE_12742	TCA	TCATCTTCAT	-707	9	+	Pisum sativum
PlantCARE_12742		motif_sequence	-1863	4	+	organism	short_function
PlantCARE_12742		motif_sequence	-1658	4	-	organism	short_function
PlantCARE_12742		motif_sequence	-1177	4	-	organism	short_function
PlantCARE_12742		motif_sequence	-1173	4	+	organism	short_function
PlantCARE_12742		motif_sequence	-1054	4	+	organism	short_function
PlantCARE_12742		motif_sequence	-711	4	+	organism	short_function
PlantCARE_12742		motif_sequence	-705	4	+	organism	short_function
PlantCARE_12742		motif_sequence	-699	4	+	organism	short_function
PlantCARE_12742		motif_sequence	-388	4	+	organism	short_function
PlantCARE_12742		motif_sequence	-349	4	+	organism	short_function
PlantCARE_12742		motif_sequence	-323	4	-	organism	short_function
PlantCARE_12742		motif_sequence	-254	4	+	organism	short_function
PlantCARE_12742		motif_sequence	-103	4	+	organism	short_function
PlantCARE_12742		motif_sequence	-64	4	+	organism	short_function
PlantCARE_12742		motif_sequence	-32	4	+	organism	short_function
PlantCARE_12742	W box	TTGACC	-1348	6	-	Arabidopsis thaliana
PlantCARE_12742	W box	TTGACC	-1247	6	-	Arabidopsis thaliana
PlantCARE_12742	W box	TTGACC	-1080	6	+	Arabidopsis thaliana
PlantCARE_12742	Myb-binding site	CAACAG	-735	6	+	Nicotiana tabacum
PlantCARE_12742	ABRE	CGTACGTGCA	-702	9	-	Hordeum vulgare	cis-acting element involved in the abscisic acid responsiveness
PlantCARE_12742	Box 4	ATTAAT	-1126	6	+	Petroselinum crispum	part of a conserved DNA module involved in light responsiveness
PlantCARE_12742	Box 4	ATTAAT	-335	6	-	Petroselinum crispum	part of a conserved DNA module involved in light responsiveness
PlantCARE_12742	O2-site	GTTGACGTGA	-1346	9	-	Zea mays	cis-acting regulatory element involved in zein metabolism regulation
PlantCARE_12742	O2-site	GATGACATGG	-656	9	-	Zea mays	cis-acting regulatory element involved in zein metabolism regulation
PlantCARE_12742	DRE1	ACCGAGA	-1500	7	+	Zea mays
PlantCARE_12742	MYC	CATGTG	-1174	6	+	Arabidopsis thaliana
PlantCARE_12742	MYC	CAATTG	-1069	6	+	Arabidopsis thaliana
PlantCARE_12742	MYC	CATGTG	-655	6	+	Arabidopsis thaliana
PlantCARE_12742	MYC	CATGTG	-603	6	+	Arabidopsis thaliana
PlantCARE_12742	MYC	CAATTG	-538	6	-	Arabidopsis thaliana
PlantCARE_12742	MYC	CATTTG	-434	6	+	Arabidopsis thaliana
PlantCARE_12742	TCT-motif	TCTTAC	-555	6	+	Arabidopsis thaliana	part of a light responsive element
PlantCARE_12742	TGACG-motif	TGACG	-37	5	+	Hordeum vulgare	cis-acting regulatory element involved in the MeJA-responsiveness
PlantCARE_12742	CGTCA-motif	CGTCA	-37	5	-	Hordeum vulgare	cis-acting regulatory element involved in the MeJA-responsiveness
PlantCARE_12742	G-box	CACGAC	-1467	6	+	Zea mays	cis-acting regulatory element involved in light responsiveness
PlantCARE_12742	G-box	CACGAC	-1230	6	+	Zea mays	cis-acting regulatory element involved in light responsiveness
PlantCARE_12742	Myc	TCTCTTA	-1821	7	-	Arabidopsis thaliana
PlantCARE_12742	Unnamed__1	CGTGG	-1265	5	-	Zea mays
PlantCARE_12742	CAAT-box	CAAT	-1803	4	-	Nicotiana glutinosa
PlantCARE_12742	CAAT-box	TGCAAATCT	-1789	9	-	Brassica juncea	common cis-acting element in promoter and enhancer regions
PlantCARE_12742	CAAT-box	CAAAT	-1787	5	-	Pisum sativum	common cis-acting element in promoter and enhancer regions
PlantCARE_12742	CAAT-box	CAAT	-1769	4	-	Nicotiana glutinosa
PlantCARE_12742	CAAT-box	CAAT	-1725	4	-	Nicotiana glutinosa
PlantCARE_12742	CAAT-box	CAAT	-1700	4	-	Nicotiana glutinosa
PlantCARE_12742	CAAT-box	CAAT	-1682	4	-	Nicotiana glutinosa
PlantCARE_12742	CAAT-box	CAAT	-1639	4	+	Nicotiana glutinosa
PlantCARE_12742	CAAT-box	CAAT	-1602	4	-	Nicotiana glutinosa
PlantCARE_12742	CAAT-box	CAAT	-1589	4	-	Nicotiana glutinosa
PlantCARE_12742	CAAT-box	CAAT	-1455	4	-	Nicotiana glutinosa
PlantCARE_12742	CAAT-box	CCAAT	-1433	5	+	Arabidopsis thaliana	common cis-acting element in promoter and enhancer regions
PlantCARE_12742	CAAT-box	CAAT	-1432	4	+	Nicotiana glutinosa
PlantCARE_12742	CAAT-box	CCAAT	-1351	5	-	Arabidopsis thaliana	common cis-acting element in promoter and enhancer regions
PlantCARE_12742	CAAT-box	CAAAT	-1295	5	-	Pisum sativum	common cis-acting element in promoter and enhancer regions
PlantCARE_12742	CAAT-box	CCAAT	-1287	5	-	Arabidopsis thaliana	common cis-acting element in promoter and enhancer regions
PlantCARE_12742	CAAT-box	CAAT	-1211	4	-	Nicotiana glutinosa
PlantCARE_12742	CAAT-box	CAAAT	-1204	5	-	Pisum sativum	common cis-acting element in promoter and enhancer regions
PlantCARE_12742	CAAT-box	CAAT	-1069	4	+	Nicotiana glutinosa
PlantCARE_12742	CAAT-box	CAAT	-1067	4	-	Nicotiana glutinosa
PlantCARE_12742	CAAT-box	CAAT	-980	4	+	Nicotiana glutinosa
PlantCARE_12742	CAAT-box	CCAAT	-847	5	+	Arabidopsis thaliana	common cis-acting element in promoter and enhancer regions
PlantCARE_12742	CAAT-box	CAAT	-846	4	+	Nicotiana glutinosa
PlantCARE_12742	CAAT-box	CCAAT	-714	5	+	Arabidopsis thaliana	common cis-acting element in promoter and enhancer regions
PlantCARE_12742	CAAT-box	CAAT	-713	4	+	Nicotiana glutinosa
PlantCARE_12742	CAAT-box	CAAAT	-673	5	-	Pisum sativum	common cis-acting element in promoter and enhancer regions
PlantCARE_12742	CAAT-box	CAAT	-538	4	+	Nicotiana glutinosa
PlantCARE_12742	CAAT-box	CAAT	-536	4	-	Nicotiana glutinosa
PlantCARE_12742	CAAT-box	CAAAT	-522	5	+	Pisum sativum	common cis-acting element in promoter and enhancer regions
PlantCARE_12742	CAAT-box	CAAT	-501	4	-	Nicotiana glutinosa
PlantCARE_12742	CAAT-box	CCAAT	-464	5	-	Arabidopsis thaliana	common cis-acting element in promoter and enhancer regions
PlantCARE_12742	CAAT-box	CAAAT	-433	5	-	Pisum sativum	common cis-acting element in promoter and enhancer regions
PlantCARE_12742	CAAT-box	CAAAT	-378	5	-	Pisum sativum	common cis-acting element in promoter and enhancer regions
PlantCARE_12742	CAAT-box	CAAT	-359	4	-	Nicotiana glutinosa
PlantCARE_12742	CAAT-box	CAAT	-331	4	-	Nicotiana glutinosa
PlantCARE_12742	CAAT-box	CAAT	-165	4	-	Nicotiana glutinosa
PlantCARE_12742	CAAT-box	CAAT	-144	4	+	Nicotiana glutinosa
PlantCARE_12742	CAAT-box	CAAT	-91	4	-	Nicotiana glutinosa
PlantCARE_12742	CAAT-box	CAAAT	-53	5	+	Pisum sativum	common cis-acting element in promoter and enhancer regions
PlantCARE_12742	CAAT-box	CAAT	-6	4	-	Nicotiana glutinosa
PlantCARE_12742	CAT-box	GCCACT	-1016	6	+	Arabidopsis thaliana	cis-acting regulatory element related to meristem expression
PlantCARE_12742	WUN-motif	AAATTTCCT	-1516	9	-	Brassica oleracea	wound-responsive element
PlantCARE_12742	TCA-element	CCATCTTTTT	-1780	9	+	Nicotiana tabacum	cis-acting element involved in salicylic acid responsiveness
PlantCARE_12742	P-box	CCTTTTG	-550	7	-	Oryza sativa	gibberellin-responsive element
PlantCARE_12742	STRE	AGGGG	-1528	5	+	Arabidopsis thaliana
PlantCARE_12742	STRE	AGGGG	-906	5	-	Arabidopsis thaliana
PlantCARE_12742	STRE	AGGGG	-853	5	-	Arabidopsis thaliana
PlantCARE_12742	STRE	AGGGG	-59	5	-	Arabidopsis thaliana
PlantCARE_12742	Unnamed__4	CTCC	-1867	4	+	Petroselinum hortense
PlantCARE_12742	Unnamed__4	CTCC	-1861	4	+	Petroselinum hortense
PlantCARE_12742	Unnamed__4	CTCC	-1550	4	+	Petroselinum hortense
PlantCARE_12742	Unnamed__4	CTCC	-1462	4	+	Petroselinum hortense
PlantCARE_12742	Unnamed__4	CTCC	-805	4	+	Petroselinum hortense
PlantCARE_12742	Unnamed__4	CTCC	-750	4	-	Petroselinum hortense
PlantCARE_12742	Unnamed__4	CTCC	-716	4	+	Petroselinum hortense
PlantCARE_12742	Unnamed__4	CTCC	-398	4	-	Petroselinum hortense
PlantCARE_12742	Unnamed__4	CTCC	-323	4	-	Petroselinum hortense
PlantCARE_12742	Unnamed__4	CTCC	-232	4	+	Petroselinum hortense
PlantCARE_12742	Unnamed__4	CTCC	-101	4	+	Petroselinum hortense
PlantCARE_12742	Unnamed__4	CTCC	-30	4	+	Petroselinum hortense
PlantCARE_12742	Unnamed__4	CTCC	-15	4	-	Petroselinum hortense
PlantCARE_12742	as-1	TGACG	-37	5	+	Arabidopsis thaliana
PlantCARE_12742	TCCC-motif	TCTCCCT	-102	7	+	Spinacia oleracea	part of a light responsive element
PlantCARE_12742	AT~TATA-box	TATATAAA	-1939	8	-	Arabidopsis thaliana
PlantCARE_12742	AT~TATA-box	TATATA	-1937	6	+	Arabidopsis thaliana
PlantCARE_12742	MBS	CAACTG	-1340	6	+	Arabidopsis thaliana	MYB binding site involved in drought-inducibility
PlantCARE_12742	MBS	CAACTG	-512	6	+	Arabidopsis thaliana	MYB binding site involved in drought-inducibility

## Sheet: S2,stilbens
Table S2. Stilbene content in the obtained cell lines, mg/g dry weight
		KA0			F1			F2			F3
		mean	SE		mean	SE		mean	SE		mean	SE
di-glucoside res		0.162605	0.00817734		0.197186	0.0235158		0.203902	0.0155064		0.165117	0.019968
t-Piceid		0.0695531	0.00997928		0.100269	0.0199898		0.0687354	0.00889309		0.0602864	0.0108814
cis-Piceid		0	0		0	0		0.00168367	0.00097207		0	0
t-Piceatannol		0.00148824	0.000859234		0.000511261	0.000295177		0.000961795	0.000555292		0	0
t-Resveratrol		0.0881087	0.0102137		0.136925	0.0713225		0.14807	0.0347236		0.134441	0.0108663
cis-Resveratrol		0.000812523	0.000812523		0	0		0	0		0	0		Total stilbene content, mg/g dry weight
epsilon-Viniferin		0.00718664	0.0041508		0.00940228	0.00827066		0.0171282	0.00335014		0.0112748	0.00198677		cell line	mean	SE
D-Viniferin		0.0452003	0.0233533		0.021569	0.0154924		0.0400185	0.00853405		0.027764	0.00602543		KA0	0.374954	0.0490712
		0.374954	0.0490712		0.465863	0.104519		0.4805	0.0415578		0.398883	0.0246837		F1	0.465863	0.104519
														F2	0.4805	0.0415578
					S1-1			S1-2			S1-3			F3	0.398883	0.0246837
#	rt				mean	SE		mean	SE		mean	SE		S1-1	0.332152	0.0348064
1	17.3	di-glucoside res			0.163026	0.00871477		0.192148	0.0266517		0.12625	0.0278106		S1-2	0.474918	0.0708294
2	23.1	t-Piceid			0.0816418	0.0174289		0.0725436	0.0110825		0.0161597	0.000642127		S1-3	0.263302	0.0467915
3	23.9	cis-Piceid			0	0		0	0		0	0		S2-1	0.503775	0.038069
4	25	t-Piceatannol			0.00068811	0.00039728		0	0		0	0		S2-2	0.401373	0.126512
5	29.1	t-Resveratrol			0.0631351	0.0116508		0.127117	0.0309631		0.0968043	0.0205233		S2-3	0.32847	0.0487682
6	32	cis-Resveratrol			0	0		0	0		0	0
7	35.1	epsilon-Viniferin			0.00458796	0.00152958		0.0106802	0.00293915		0.00317975	0.00115129
8	38	D-Viniferin			0.0190732	0.00448415		0.0724293	0.0104375		0.0209083	0.000954157
	total				0.332152	0.0348064		0.474918	0.0708294		0.263302	0.0467915
					S2-1			S2-2			S2-3
#	rt				mean	SE		mean	SE		mean	SE
1	17.3	di-glucoside res			0.195537	0.0197598		0.188496	0.0413691		0.16496	0.0333217
2	23.1	t-Piceid			0.0672885	0.0118445		0.0420722	0.0124848		0.035757	0.00711539
3	23.9	cis-Piceid			0	0		0	0		0	0
4	25	t-Piceatannol			0	0		0	0		0.00146772	0.000847389
5	29.1	t-Resveratrol			0.177941	0.0432416		0.123943	0.0522944		0.0992136	0.0132274
6	32	cis-Resveratrol			0	0		0	0		0	0
7	35.1	epsilon-Viniferin			0.00736159	0.000489349		0.00643833	0.00209874		0.00958972	0.00282839
8	38	D-Viniferin			0.0556469	0.00946861		0.0404237	0.0217063		0.0174822	0.00538587
	total				0.503775	0.038069		0.401373	0.126512		0.32847	0.0487682

## Sheet: S3,primers
Table S3: Primers used for amplification of VaCCaMK cDNAs in PCR
	primer name	5ꞌ-3ꞌ
	CCaMK-begin-s	ATGGGACAGGAAACAAGG
	CCaMK-end-a	CTATAGTGGGCGGAGAGA
	VaCCaMK-real-total-s	CCAACAGCGATGGAAAAGTC
	VaCCaMK-real-total-a	CTATAGTGGGCGGAGAGA
	VaCCaMK-real-endo-s	CCAACAGCGATGGAAAAGTC
	VaCCaMK-real-endo-a	AGGCAAACAGGGGAAGTGGGAA
	VaCCaMK-real-trans-s	CCAACAGCGATGGAAAAGTC
	VaCCaMK-real-trans-a	GAGAGACTGGTGATTTTTGCG
	VaCCaMKS-Bgl-s	GCTCAGATCTATGGGACAGGAAACAAGGA
	VaCCaMKS-Sal-a	TCGAGTCGACCTATAGTGGGCGGAGAGAGG
